# Supplementary material for: Processing-Induced Markers in Proteins of Commercial Plant-Based Drinks in Relation to Compositional Aspects
Source: MDPI journal article supplement (doi:10.3390/foods12173282), 2023-09-01
Supplement: s1 [file s1]

**Table S1.** Declared contents of PBDsc, their name and manufacture company.  
The commercial names are in some cases translated to English.

| Sample Name | Content                                                                                                                                           | Commercial name              | Company            |
|-------------|---------------------------------------------------------------------------------------------------------------------------------------------------|------------------------------|--------------------|
| Oat 1       | Water, 16% oat, sunflower oil, inulin, seasalt                                                                                                    | Oat                          | Naturli' Foods A/S |
| Oat 2       | Water, oat (8%), sunflower oil, algae lithothamnium calcareum, seasalt, gellan and guar gum                                                       | Oat drink                    | Naturli' Foods A/S |
| Oat 3       | Water, oat (9.5%), sunflower oil, calciumcarbonat, salt, gellangum, vitamin D, B2, B12                                                            | Oat Plus                     | Naturli' Foods A/S |
| Oat 4       | Water, oat (15%), rapeseed oil, tricalcium phosphate, calciumcarbonat, seasalt, vitamins D, B2, B12                                               | Oats for Coffee              | Naturli' Foods A/S |
| Oat 5       | Water, oat (13%), rapeseed oil, tricalcium phosphate, seasalt, gellan gum, vitamin D, B2, B12                                                     | Oat Barista                  | Naturli' Foods A/S |
| Oat 6       | Water, gluten-free oat (10%), sunflower oil, vanilla aroma, salt, inulin, aroma, gellan gum                                                       | Oat Zero                     | Naturli' Foods A/S |
| Oat 7       | Oat base (water, oat 10%), rapeseed oil, calcium carbinat, calcium phosphate, salt, vitamins (D3, B2, B12)                                        | Oat                          | Dryk               |
| Oat 8       | Water, oat (15%)                                                                                                                                  | Plant 0.5                    | Mill-Life          |
| Oat 9       | Water, oat (15%), rapeseed oil, salt                                                                                                              | Oat                          | Jörd, Arla Foods   |
| Oat/hemp    | Water, 15% oat, hemp paste (0.75%), salt                                                                                                          | Oat and Hemp                 | Jörd, Arla Foods   |
| Oat/barley  | Water, oat (12.5%), barley malt extract (2.3%) rapeseed oil, salt                                                                                 | Oat and Barley               | Jörd, Arla Foods   |
| Oat/pea     | Water, 13% oat, 1% pea protein, 1% rapeseed oil, 1% salt                                                                                          | Oats and More                | Thise              |
| Almond 1    | Water, 2% almond, cane sugar, lithothamnium calcareum, seasalt, gellan gum, guar gum                                                              | Almond Drink                 | Naturli' Foods A/S |
| Almond 2    | Water, cane sugar, 2% roasted almond, lithothamnium calcareum, seasalt, gellan gum, guar gum                                                      | Roasted Almond               | Naturli' Foods A/S |
| Pea         | Water, 2.5% pea protein, agave sirup, rapeseed olie, dikaliumposphat, calcium carbonat, calcium phosphate, oat olie, salt, vitamins (D2, B2, B12) | Pea                          | Dryk               |
| Soy 1       | Water, 10% soy beans                                                                                                                              | Soy Drink                    | Naturli' Foods A/S |
| Soy 2       | Water, 10% soy beans, rice, lithothamnium calcareum, vanilla aroma, seasalt                                                                       | Soy with Calcium and vanilla | Naturli' Foods A/S |
